# Supplementary material for: Teaching Bleeding Control and Building Trust With a Community Affected by Firearm Injuries
Source: PubMed Central journal article supplement (PMC11391356; doi:10.1001/jamasurg.2024.3372), 2024-09-11
Supplement: jamasurg-e243372-s002.pdf [file jamasurg-e243372-s002.pdf]

## **Data Sharing Statement**

Stadeli. Teaching Bleeding Control and Building Trust With a Community Affected by Firearm Injuries. *JAMA Surg*. Published September 11, 2024. doi:10.1001/jamasurg.2024.3372

### **Data**

**Data available:** No
